# Supplementary material
Source: PubMed Central journal article supplement (PMC6984594)

## SUPPLEMENTARY MATERIAL AND METHODS

### *Multi Marker Methods (MMM)*

Bayes A (BA) and Bayesian LASSO (BL) were coupled with the sequential threshold model developed by Albert and Chib [1] to handle the large  $p$  small  $n$  problem accounting for the time to event and censoring. It assumes that for an observation of a patient to be present at a given period of time, he/she must have survived through all previous time periods. Thus, the probability of not presenting the event of interest until interval  $l$ , conditional on the event that the  $l$ -th interval has been reached, is given by

$$\Pr(y_i = l | y_i \geq l-1, \gamma, \theta) = \Phi\left(\frac{\gamma_l - \mathbf{X}'\theta}{\sigma_e^2}\right),$$
 where  $\gamma$  corresponds to unordered cutoff points

corresponding to each time interval,  $\mathbf{X}$  corresponds to the incidence matrix of effects ( $\theta$ ) affecting the liability to survive to the next interval given that the present interval has been reached and  $\sigma_e^2$  is the residual variance, which was set to 1 for identification purposes [2]. Thus, the presence of the event of interest (first recurrence or progression) is checked in each interval, and the outcome in that interval is codified as 0 if present and 1 otherwise. If the data is not censored in that interval, then the patient has data in the next interval and the outcome in that interval is codified as 0 or 1 as before mentioned. If the data is censored in the first interval, then the individual does not have data in the subsequent intervals.

Intervals were defined according to the survival functions for each event (see Figures S2 and S3), considering a minimum of events for interval. For time to first recurrence, 9 follow-up intervals were defined:  $\leq 3$ , 4-6, 7-9, 10-12, 13-18, 18-24, 24-36, 36-48 and  $> 48$  months. Regarding time to progression, 4 intervals were defined (4 levels,  $\leq 12$  months, 13-24 months, 25-48 months and  $>48$  months). When patients were stratified at

high/low risk, 4/3 intervals were defined:  $\leq 6$ ; 7-12; 13-24 and  $> 24$  months; and  $\leq 24$ ; 25-48 and  $>48$  months, respectively.

As in [3], markers were considered as associated with bladder cancer when both  $BA_t$  and  $BL_t$  identified them as associated with the outcome. Both BA and BL are characterized by thick-tailed priors, the scaled t and the double exponential (DE), respectively. These densities have higher mass at 0, which shrinks toward 0 the estimates of marker effects with small effects and induces less shrinkage (thicker tails) to markers with larger effects.

The prior distributions were  $\text{Inv} - \chi^2(4.01, 0.016)$  (scaled  $t$  prior for marker effects) in BA and an exponential density (double exponential prior for marker effects,

$\prod_{j=1}^m N(\beta_j | 0, \tau_j^2 \sigma_\varepsilon^2) \times \prod_{j=1}^m \exp(\tau_j^2 | \lambda)$ ) in BL. Parameter  $\lambda$  in BL controls the shape of the prior

distribution assigned to  $\tau_j^{-2}$ , assigning more density to small values of  $\tau_j$  than to large ones, and follows, a priori, a Gamma distribution  $G(\lambda^2 | 10, 0.75)$ . For each analysis, a

unique Markov Chain Monte Carlo of 50,000 iterations was obtained using a Gibbs sampler. The first 20,000 iterations were discarded as burn-in and all the remaining iterations were retained to infer posterior marginal distributions of unknown parameters.

Convergence of chains was assessed visually, applying the Geweke criterion [4] and running parallel chains with different initial values. A permutation within Markov Chain Monte Carlo approach [5] was used to determine the markers that were associated with the phenotype for both models. Markers were considered as associated to the trait if the

$\max(a, 1 - a) > t$ , where  $a = \int_{-\infty}^{\hat{\beta}_p} p(\beta_p | \mathbf{y}_{permu}, \boldsymbol{\beta}_{-p}) d\beta_p$ ,  $\hat{\beta}_p$  is the posterior mean of the SNP

$p$  after analyzing the original data, and  $p(\beta_p | \mathbf{y}_{permu})$  is the posterior distribution of the marker effect given the permuted data ( $\mathbf{y}_{permu}$ ).

When the existence of BCG\*SNP interactions associated with time to progression were explored in the high-risk NMIBC subgroup, we also used MMMs, adding the interaction terms to the model including clinical-pathological parameters and SNPs.

## **REFERENCES**

- [1] Albert JH, Chib S. Sequential ordinal modeling with applications to survival data. *Biometrics* 2001;57:829-36.
- [2] Sorensen D, Gianola D. Likelihood, Bayesian, and MCMC Methods in Quantitative Genetics. New York: Springer Science & Business Media; 2002.
- [3] Lopez de Maturana E, Ibanez-Escriche N, Gonzalez-Recio O, Marenne G, Mehrban H, Chanock SJ, et al. Next generation modeling in GWAS: comparing different genetic architectures. *Hum Genet* 2014;133:1235-53.
- [4] Geweke J. *Bayesian Statistics* 1992. p. 169-93.
- [5] Che X, Xu S. Significance test and genome selection in bayesian shrinkage analysis. *Int J Plant Genomics* 2010;2010:893206.

**Table S1:** List of inflammation-related genes selected for the study.

|         |        |          |         |           |           |
|---------|--------|----------|---------|-----------|-----------|
| ABCA1   | CCR10  | CXCR3    | IL12A   | MAP3K7    | SOCS5     |
| ABCA7   | CCR2   | CXCR4    | IL12B   | MAP3K7IP2 | SOCS6     |
| ABCC4   | CCR3   | CXCR7    | IL13    | MAPK14    | STAT1     |
| ABCF1   | CCR4   | EIF2AK2  | IL15    | MASP1     | STAT3     |
| ABO     | CCR5   | EPHX2    | IL15RA  | MBL2      | TBK1      |
| AICDA   | CCR7   | EXO1     | IL16    | MPO       | TFF1      |
| AIRE    | CCR7   | FADD     | IL17A   | MS4A1     | TFF3      |
| AKR1C3  | CCR9   | FAS      | IL17C   | MSH2      | TGFB1     |
| AKT1    | CD14   | FAS      | IL18    | MX1       | TGFBR1    |
| ALOX12  | CD180  | FASLG    | IL1A    | MYD88     | TICAM1    |
| ALOX15  | CD2    | FCGR2A   | IL1B    | NBS1      | TIRAP     |
| ALOX5   | CD274  | FOS      | IL1RN   | NCF2      | TLR1      |
| ANPEP   | CD28   | GATA3    | IL2     | NFKB1     | TLR10     |
| APOA2   | CD3    | GDF15    | IL21    | NFKBIA    | TLR2      |
| ARHGDI3 | CD33   | GSK3B    | IL21R   | NINJ1     | TLR4      |
| BCL10   | CD4    | H2AFX    | IL22    | NLRP12    | TLR6      |
| BCL3    | CD40   | HAVCR2   | IL23    | NOD2      | TLR9      |
| BCL6    | CD45   | HDAC5    | IL2RA   | NOS2A     | TMED7     |
| BIRC2   | CD5    | HDAC7A   | IL3     | OPRD1     | TMEM189   |
| BIRC3   | CD68   | HFE      | IL4     | OSCAR     | TNF       |
| BIRC5   | CD8    | HLA-A    | IL4R    | PARP4     | TNFAIP3   |
| BLNK    | CD80   | HLA-B    | IL6     | PPARG     | TNFRSF10A |
| CARD15  | CD81   | HLA-C    | IL6R    | PRF1      | TNFRSF1A  |
| CARD4   | CD86   | HLA-E    | IL7     | PRG3      | TNFRSF7   |
| CASP1   | CDH1   | HLA-F    | IL7R    | PRKRA     | TNFSF14   |
| CASP3   | CFH    | HLA-G    | IL8     | PTGS1     | TNIP1     |
| CASP8   | CFLAR  | HLA-H    | IL8RA   | PTGS2     | TOLLIP    |
| CASP9   | CGB    | HSP90AA1 | IL8RB   | RAG1      | TRADD     |
| CBR1    | CHKA   | HSPA4    | IRAK2   | RELA      | TRAF1     |
| CCL13   | CHUK   | HSPB1    | IRF1    | RHOA      | TRAF2     |
| CCL17   | COX2   | HSPD1    | IRF3    | RIPK1     | TRAF5     |
| CCL17   | CRP    | ICAM1    | JAG2    | RIPK2     | TRAF6     |
| CCL19   | CSF1R  | ICBR     | JAK1    | ROCK1     | TSLP      |
| CCL2    | CSF3   | IFNAR2   | JAK3    | SARM1     | UBE2N     |
| CCL21   | CTLA4  | IFNG     | LEPR    | SCARB1    | ULBP1     |
| CCL22   | CX3CL1 | IFNGR1   | LITAF   | SELE      | ULBP2     |
| CCL22   | CX3CR1 | IFNGR2   | LTA     | SFTPD     | ULBP3     |
| CCL28   | CXCL10 | IKBKB    | LY96    | SIGIRR    | VCAM1     |
| CCL28   | CXCL11 | IKZF1    | MAP2K3  | SLAMF1    | WWP1      |
| CCL5    | CXCL12 | IL10     | MAP2K4  | SLC20A1   | XBP1      |
| CCND3   | CXCL9  | IL10RA   | MAP3K14 | SLC44A2   | YY1       |
| CCR1    | CXCR1  | IL11     | MAP3K3  | SOCS2     |           |

**Table S2:** Variables used for adjustment in the single and multimarker models.

---

|     |                                                                                                                         |
|-----|-------------------------------------------------------------------------------------------------------------------------|
| TFR | Area + gender + multiplicity <sup>a</sup> + TSG <sup>b</sup> + tumour size <sup>c</sup> + treatment <sup>d</sup>        |
| TP  | Area + age + multiplicity <sup>a</sup> + TSG <sup>b</sup> + number of recurrences <sup>e</sup> + treatment <sup>f</sup> |

---

TFR = Time to first recurrence; TP= Time to progression : TSG = Tumour stage and grade

<sup>a</sup> Divided in 3 categories: 1= One tumour, 2= >1, and 3= missing data.

<sup>b</sup> Divided in 6 categories: 1= PUNLMP+TaG1, 2= TaG2, 3= TaG3, 4= T1G2, 5= T1G3 and 6=TiG2+TiG3.

<sup>c</sup> Divided in 3 categories: 1= < or equal 3 cm, 2= >3 cm and 3= missing data.

<sup>d</sup> Divided in 5 categories 1= TURB alone, 2= TURB+intravesical chemotherapy, 3= TURB +Bacillus Calmette Guerin (BCG), 4= TURB+intravesical chemotherapy+BCG and 5= Other treatments.

<sup>e</sup> Divided in 3 categories 1= 1 recurrence, 2= 2 recurrences, 3= 3 recurrences and 4= >3 previous recurrences.

<sup>f</sup> Divided in 6 categories as in <sup>d</sup> plus TURB+radical cystectomy.

**Table S3:** Treatment characteristics.

|                   | <b>Low Risk (N=538)</b> | <b>High Risk (N=284)</b> |
|-------------------|-------------------------|--------------------------|
|                   | <b>N (%)</b>            | <b>N (%)</b>             |
| TURB              | 274 (51)                | 78 (27.5)                |
| TURB + IVC        | 134 (25)                | 46 (16.2)                |
| TURB + BCG        | 111 (20.6)              | 134 (47.3)               |
| TURB + IVC + BCG  | 12 (2.2)                | 9 (3.1)                  |
| TURB + Cystectomy | 4 (0.7)                 | 8 (2.8)                  |
| Others            | 3 (0.5)                 | 9 (3.1)                  |

TURB = Trans Urethral Resection of the Bladder; IVC= Intra-vesical chemotherapy; BCG = Bacillus Calmette et Guerin.

**Table S4:** The top 10 autosomal SNPs associated with NMIBC risk of first recurrence using multivariate Cox regression additive model.

| GENE         | SNP        | HR   | <i>p-value</i> | MAF  |
|--------------|------------|------|----------------|------|
| <i>TNIP1</i> | rs2277940  | 1.74 | 0.0001         | 0.07 |
| <i>CCL28</i> | rs779850   | 0.61 | 0.0004         | 0.17 |
| <i>CCR9</i>  | rs2191031  | 0.62 | 0.0005         | 0.17 |
| <i>PPARG</i> | rs3112395  | 1.73 | 0.0007         | 0.05 |
| <i>CCL2</i>  | rs10805673 | 0.75 | 0.0012         | 0.49 |
| <i>CARD4</i> | rs10267377 | 0.71 | 0.0013         | 0.29 |
| <i>PTPRC</i> | rs1036332  | 0.73 | 0.0029         | 0.27 |
| <i>RIPK1</i> | rs6596945  | 0.70 | 0.0029         | 0.22 |
| <i>CD3Z</i>  | rs1554669  | 1.50 | 0.0044         | 0.07 |
| <i>CCR2</i>  | rs3138042  | 0.76 | 0.0046         | 0.34 |

Analyses were adjusted for: geographical area, gender, multiplicity, tumour stage&grade, tumour size, and treatment (See, Table S2).

**Table S5:** SNPs with a strong posterior probability (PP>80%) of being associated with time to first recurrence considering all NMIBC patients. Those with PP in both BA and BL >90% are bold-faced. The last column shows Cox regression results. SNPs in red were also among the top10 SNPs identified by Cox regression.

| Gene           | SNP              | MA<br>F     | BA                      |            | BL                      |            | Single<br>marker Cox |              |
|----------------|------------------|-------------|-------------------------|------------|-------------------------|------------|----------------------|--------------|
|                |                  |             | HR <sub>aa_A</sub><br>A | PP>80<br>% | HR <sub>aa_A</sub><br>A | PP>80<br>% | HR                   | p-<br>value  |
|                |                  |             |                         |            | 1.17                    |            | 1.2                  | 0.048        |
| <i>JAK3</i>    | rs6523*          | 0.40        | 1.69                    | 98         |                         | 92         | 0                    | 8            |
|                |                  |             |                         |            | 1.14                    |            | 1.3                  | 0.064        |
| <i>CCL2</i>    | rs4497746        | 0.08        | 1.59                    | 94         |                         | 87         | 1                    | 1            |
|                |                  |             |                         |            | 1.15                    |            | 1.2                  | 0.034        |
| <i>ICEBERG</i> | rs3736149        | 0.43        | 1.41                    | 93         |                         | 89         | 0                    | 9            |
|                |                  |             |                         |            | 1.13                    |            | 1.2                  | 0.123        |
| <i>CD180</i>   | rs5744463        | 0.11        | 1.52                    | 93         |                         | 86         | 3                    | 0            |
|                |                  |             |                         |            | 0.87                    |            | 0.5                  | 0.005        |
| <i>ICAMI</i>   | rs5030390        | 0.08        | 0.63                    | 92         |                         | 87         | 6                    | 3            |
|                |                  |             |                         |            | 1.10                    |            | 1.0                  | 0.382        |
| <i>CD274</i>   | rs7043593        | 0.23        | 1.44                    | 92         |                         | 81         | 9                    | 7            |
|                |                  |             |                         |            | 0.88                    |            | 0.6                  | 0.005        |
| <i>MAP3K14</i> | rs3785803        | 0.14        | 0.67                    | 91         |                         | 87         | 8                    | 8            |
|                |                  |             |                         |            | <b>1.24</b>             |            | <b>1.7</b>           | <b>0.000</b> |
| <i>TNIP1</i>   | <b>rs2277940</b> | <b>0.07</b> | <b>1.50</b>             | <b>91</b>  |                         | <b>94</b>  | <b>4</b>             | <b>1</b>     |
|                |                  |             |                         |            | <b>0.86</b>             |            | <b>0.8</b>           | <b>0.012</b> |
| <i>CD5</i>     | <b>rs7104333</b> | <b>0.49</b> | <b>0.72</b>             | <b>90</b>  |                         | <b>92</b>  | <b>1</b>             | <b>6</b>     |



|                  |                |      |      |    | <b>0.84</b> |    | <b>0.7</b> | <b>0.001</b> |
|------------------|----------------|------|------|----|-------------|----|------------|--------------|
| <i>CCL28</i>     | rs1080567<br>3 | 0.49 | 0.73 | 90 |             | 94 | 5          | 2            |
|                  |                |      |      |    | 1.16        |    | 1.2        | 0.009        |
| <i>BLNK</i>      | rs11188660     | 0.29 | 1.42 | 89 |             | 90 | 7          | 8            |
|                  |                |      |      |    | 1.11        |    | 1.1        | 0.062        |
| <i>SCARB1</i>    | rs3924313      | 0.33 | 1.29 | 89 |             | 84 | 8          | 8            |
|                  |                |      |      |    | 0.84        |    | 0.7        | 0.002        |
| <i>PTPRC</i>     | rs1036332      | 0.27 | 0.69 | 89 |             | 92 | 3          | 9            |
|                  |                |      |      |    | 0.88        |    | 0.8        | 0.069        |
| <i>BLNK</i>      | rs12772113     | 0.23 | 0.71 | 89 |             | 87 | 2          | 5            |
|                  |                |      |      |    | 0.84        |    | 0.6        | 0.000        |
| <i>CCR9</i>      | rs2191031      | 0.17 | 0.70 | 88 |             | 92 | 2          | 5            |
|                  |                |      |      |    | 0.89        |    | 0.8        | 0.017        |
| <i>CCL2</i>      | rs317325       | 0.37 | 0.74 | 88 |             | 87 | 0          | 9            |
|                  |                |      |      |    | 0.86        |    | 0.7        | 0.001        |
| <i>CARD4</i>     | rs10267377     | 0.29 | 0.75 | 88 |             | 90 | 1          | 3            |
| <i>RIPK1</i>     | rs6596945      | 0.22 | 0.74 | 88 | 0.86        | 90 |            |              |
|                  |                |      |      |    | 1.10        |    | 1.1        | 0.236        |
| <i>CMKOR1</i>    | rs7556982      | 0.47 | 1.34 | 88 |             | 82 | 1          | 4            |
|                  |                |      |      |    | 0.90        |    | 0.8        | 0.154        |
| <i>IL18</i>      | rs11214093     | 0.43 | 0.75 | 87 |             | 85 | 8          | 1            |
|                  |                |      |      |    | 0.91        |    | 0.8        | 0.204        |
| <i>TNFRSF10A</i> | rs2235126      | 0.29 | 0.77 | 87 |             | 81 | 8          | 3            |
|                  |                |      |      |    | 0.91        |    | 0.8        | 0.318        |
| <i>CX3CL1</i>    | rs2239354      | 0.10 | 0.71 | 87 |             | 81 | 6          | 7            |
|                  |                |      |      |    | 1.09        |    | 1.1        | 0.249        |
| <i>CD33</i>      | rs3865444      | 0.29 | 1.30 | 87 |             | 80 | 2          | 0            |

---

|               |            |      |      |    |      |    |     |       |
|---------------|------------|------|------|----|------|----|-----|-------|
|               |            |      |      |    | 1.13 |    | 1.2 | 0.056 |
| <i>IL6</i>    | rs13247988 | 0.25 | 1.35 | 86 |      | 86 | 0   | 1     |
|               |            |      |      |    | 1.09 |    | 1.2 | 0.041 |
| <i>CD3Z</i>   | rs858553   | 0.39 | 1.30 | 86 |      | 81 | 0   | 9     |
|               |            |      |      |    | 0.88 |    | 0.8 | 0.067 |
| <i>CD3D</i>   | rs2276424  | 0.30 | 0.75 | 86 |      | 88 | 3   | 5     |
|               |            |      |      |    | 0.90 |    | 0.7 | 0.062 |
| <i>CD5</i>    | rs7342164  | 0.14 | 0.73 | 86 |      | 83 | 7   | 8     |
|               |            |      |      |    | 1.10 |    | 1.2 | 0.026 |
| <i>CD8B1</i>  | rs13024609 | 0.20 | 1.34 | 85 |      | 82 | 5   | 8     |
|               |            |      |      |    | 1.12 |    | 1.2 | 0.032 |
| <i>HAVCR2</i> | rs919746   | 0.16 | 1.30 | 85 |      | 84 | 7   | 0     |
|               |            |      |      |    | 0.89 |    | 0.7 | 0.004 |
| <i>CCR2</i>   | rs3138042  | 0.34 | 0.78 | 84 |      | 87 | 6   | 6     |
|               |            |      |      |    | 0.88 |    | 0.8 | 0.012 |
| <i>CMKOR1</i> | rs2720100  | 0.48 | 0.77 | 84 |      | 87 | 0   | 2     |
|               |            |      |      |    | 0.87 |    | 0.6 | 0.000 |
| <i>CCL28</i>  | rs779850   | 0.17 | 0.77 | 84 |      | 89 | 1   | 4     |
|               |            |      |      |    | 1.14 |    | 1.2 | 0.010 |
| <i>TNF</i>    | rs1799964  | 0.24 | 1.30 | 84 |      | 87 | 8   | 9     |
|               |            |      |      |    | 0.91 |    | 0.6 | 0.009 |
| <i>IFNGR1</i> | rs3799488  | 0.12 | 0.77 | 83 |      | 82 | 7   | 9     |
|               |            |      |      |    | 0.91 |    | 0.8 | 0.195 |
| <i>CCL21</i>  | rs2812377  | 0.37 | 0.77 | 83 |      | 83 | 9   | 5     |
|               |            |      |      |    | 1.11 |    | 1.3 | 0.018 |
| <i>CD80</i>   | rs9282638  | 0.16 | 1.28 | 83 |      | 83 | 0   | 0     |

---

|               |            |      |      |    |      |    |     |       |
|---------------|------------|------|------|----|------|----|-----|-------|
|               |            |      |      |    | 0.90 |    | 0.8 | 0.094 |
| <i>IFNGR2</i> | rs1059293  | 0.44 | 0.81 | 83 |      | 85 | 6   | 8     |
|               |            |      |      |    | 0.90 |    | 0.8 | 0.101 |
| <i>CXCR4</i>  | rs543721   | 0.45 | 0.77 | 82 |      | 84 | 6   | 8     |
|               |            |      |      |    | 0.91 |    | 0.7 | 0.014 |
| <i>PRKRA</i>  | rs2059691  | 0.35 | 0.80 | 82 |      | 84 | 9   | 7     |
|               |            |      |      |    | 1.12 |    | 1.7 | 0.000 |
| <i>PPARG</i>  | rs3112395  | 0.05 | 1.35 | 81 |      | 83 | 3   | 7     |
|               |            |      |      |    | 1.12 |    | 1.2 | 0.005 |
| <i>IL23R</i>  | rs10489628 | 0.35 | 1.26 | 81 |      | 85 | 7   | 0     |
|               |            |      |      |    | 1.10 |    | 1.2 | 0.081 |
| <i>ABCA1</i>  | rs4149313  | 0.18 | 1.23 | 80 |      | 83 | 1   | 7     |
|               |            |      |      |    | 1.09 | 81 | 1.1 | 0.126 |
| <i>BLNK</i>   | rs11188661 | 0.34 | 1.23 | 80 |      |    | 4   | 3     |

\* Previously as rs2286662. Analyses were adjusted for: geographical area, gender, multiplicity, tumour stage&grade, tumour size, and treatment (See, Table S2).

**Table S6.** SNPs with a strong posterior probability (PP>75%) of being associated with time to first progression considering high-risk NMIBC patients. The last column displays the Cox regression results for each SNP + covariates. SNPs in red were also among the top10 SNPs identified with Cox regression.

| Gene           | SNP       | MAF  | BA                  |        | BL                  |        | Cox regression |         |
|----------------|-----------|------|---------------------|--------|---------------------|--------|----------------|---------|
|                |           |      | HR <sub>aa_AA</sub> | PP>75% | HR <sub>aa_AA</sub> | PP>75% | HR             | p-value |
| <i>TMEM189</i> | rs2269217 | 0.23 | 1.31                | 80     | 1.10                | 80     | 2.41           | 0.0003  |
| <i>MAP2K3</i>  | rs9901404 | 0.48 | 1.27                | 77     | 1.10                | 80     | 1.86           | 0.0018  |
| <i>CARD4</i>   | rs2256023 | 0.44 | 1.27                | 79     | 1.09                | 79     | 1.68           | 0.0084  |

Analyses were adjusted for: geographical area, age, multiplicity, tumour stage&grade, number of recurrences, and treatment (See, Table S2).

**Table S7:** SNPs with a strong posterior probability (PP>75%) of being associated with time to first progression considering low-risk NMIBC patients. The last column displays the Cox regression results for each SNP + covariates. The SNP (in red) was also among the top10 SNPs identified with Cox regression.

| Gene        | SNP        | MAF  | BA                  |        | BL                  |        | Cox regression |         |
|-------------|------------|------|---------------------|--------|---------------------|--------|----------------|---------|
|             |            |      | HR <sub>aa_AA</sub> | PP>75% | HR <sub>aa_AA</sub> | PP>75% | HR             | p-value |
| <i>CD68</i> | rs12942088 | 0.43 |                     |        | 1.08                | 75     | 2.91           | 0.0006  |

Analyses were adjusted for: geographical area, age, multiplicity, tumour stage&grade, number of recurrences, and treatment (See, Table S2).

**Table S8.** Apparent and validated c-index using Bootstrap alone or 1000 bootstrap cross validation indicating the discriminatory ability of the models including the clinical variables (CV) and each of the SNPs showing an association with each outcome of interest.

|                                      | Apparent <i>c</i> -index | Bootstrap alone <i>c</i> -index | Bootstrap cross validation <i>c</i> -index |
|--------------------------------------|--------------------------|---------------------------------|--------------------------------------------|
| <b>Recurrence ALL (N=268 events)</b> |                          |                                 |                                            |
| CV + rs2277940 <sup>a</sup>          | 64                       | 61.3                            | 59.8                                       |
| CV + rs7104333 <sup>b</sup>          | 63.2                     | 60.6                            | 59                                         |
| CV + rs2286662 <sup>c</sup>          | 63.3                     | 60.5                            | 58.9                                       |
| CV + rs2277940 + rs7104333           | 64.5                     | 61.8                            | 60.3                                       |
| CV + rs2277940 + rs2286662           | 64.3                     | 61.7                            | 60.1                                       |
| CV + rs7104333 + rs2286662           | 63.7                     | 61                              | 59.4                                       |
| <b>Progression ALL (N=76 events)</b> |                          |                                 |                                            |
| CV + rs698079 <sup>d</sup>           | 78.1                     | 74.9                            | 72.2                                       |
| CV + rs941405 <sup>e</sup>           | 78.1                     | 75.1                            | 72.6                                       |
| <b>Progression HiR (N=52 events)</b> |                          |                                 |                                            |
| CV + rs2256023                       | 71.6                     | 65.5                            | 62                                         |
| CV + rs9901404                       | 71.9                     | 65.7                            | 62.1                                       |
| CV + rs2269217                       | 72.2                     | 67                              | 63.9                                       |
| CV + rs2269217 + rs9901404           | 74.3                     | 68.8                            | 65.6                                       |
| CV + rs9901404 + rs2256023           | 73.8                     | 63.8                            | 67.5                                       |
| CV + rs2269217 + rs2256023           | 73.6                     | 68                              | 64.8                                       |

<sup>a</sup> *TNIP1*; <sup>b</sup> *CD5*; <sup>c</sup> *JAK3*; <sup>d</sup> *MASP1*; <sup>e</sup> *AIRE*; <sup>f</sup> *CARD4*; <sup>g</sup> *MAP2K3*; <sup>h</sup> *TMEM189*

**Figure S1.** Methodology used for statistical analyses. A Single Marker Method (SMM) consists of inclusion of each SNP individually while a Multi Marker Method (MMM) allows inclusion of all SNPs together in the model. Interest lies in mimicking the polygenic scenario that features bladder cancer prognosis.

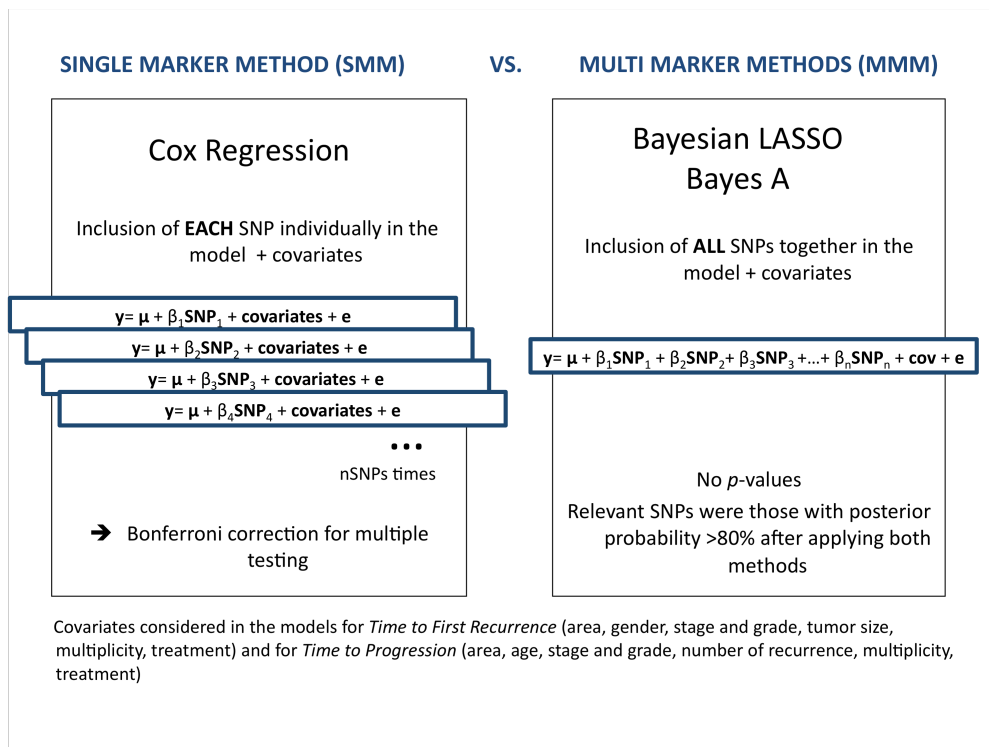

**Figure S2.** Survival curve for time to recurrence considering all of non-muscle invasive bladder cancer patients.

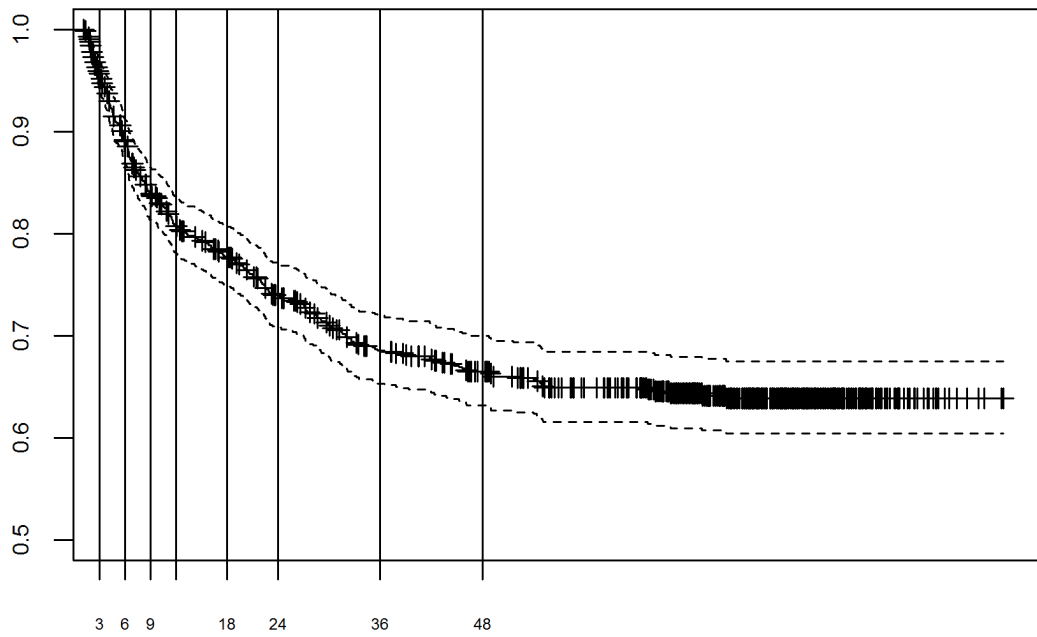



**Figure S3.** Survival curve for time to first progression considering all of non-muscle invasive bladder cancer patients.

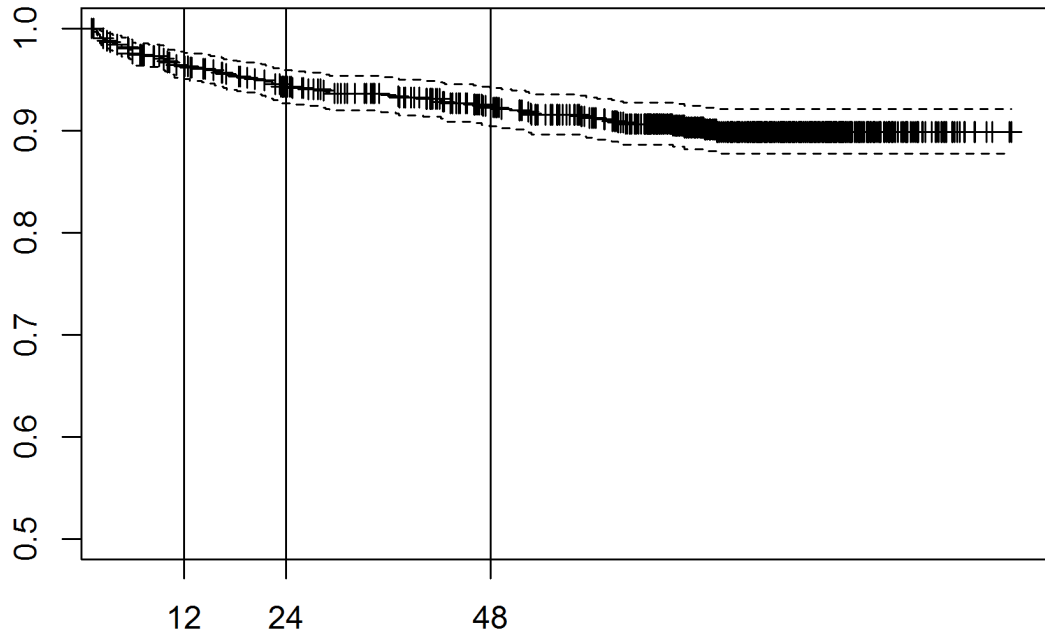

Supplement: NIHMS1014808-supplement-1.pdf [file NIHMS1014808-supplement-1.pdf]
